# Supplementary material for: Influence of KCl on the interfacial activity and conformation of hemoglobin studied by Langmuir–Blodgett technique
Source: Royal Society of Chemistry journal article supplement (doi:10.1039/c0cp00344a), 2010-01-01

**Supporting Information**

**Influence of KCl on the Interfacial Activity and  
Conformation of Hemoglobin Studied by  
Langmuir Blodgett Technique**

**Mrityunjoy Mahato <sup>§</sup>, Prabir Pal <sup>§</sup>, Tapanendu Kamilya <sup>§, #</sup>, Ratan Sarkar <sup>§</sup>,  
Avinanda Chaudhuri <sup>§</sup> and G. B. Talapatra <sup>§, \*</sup>**

*Department of Spectroscopy, Indian Association for the Cultivation of Science,  
Jadavpur, Kolkata-700 032, India*

\*Corresponding author: Phone: +91-33-24734971, Fax: +91-33-24732805, E-mail:

[spgbt@iacs.res.in](mailto:spgbt@iacs.res.in)

<sup>§</sup> Department of Spectroscopy

<sup>#</sup> Present address: Department of Physics, Narajole Raj College, Narajole, Paschim  
Medinipur -721 211, India

**Figure S1.** Panel-A represents the plot of surface pressure (mN/m) vs time (s) of Hb ( $C_{\text{Hb}}=0.0005\text{mg/mL}$ ) with varying concentration of KCL ( $C_{\text{KCL}}=0, 10, 100, 500, 1000$  mM respectively) at the subphase. Panel-B represents the same measurement with different concentration of Hb ( $C_{\text{Hb}}=0.001\text{mg/mL}$ ).

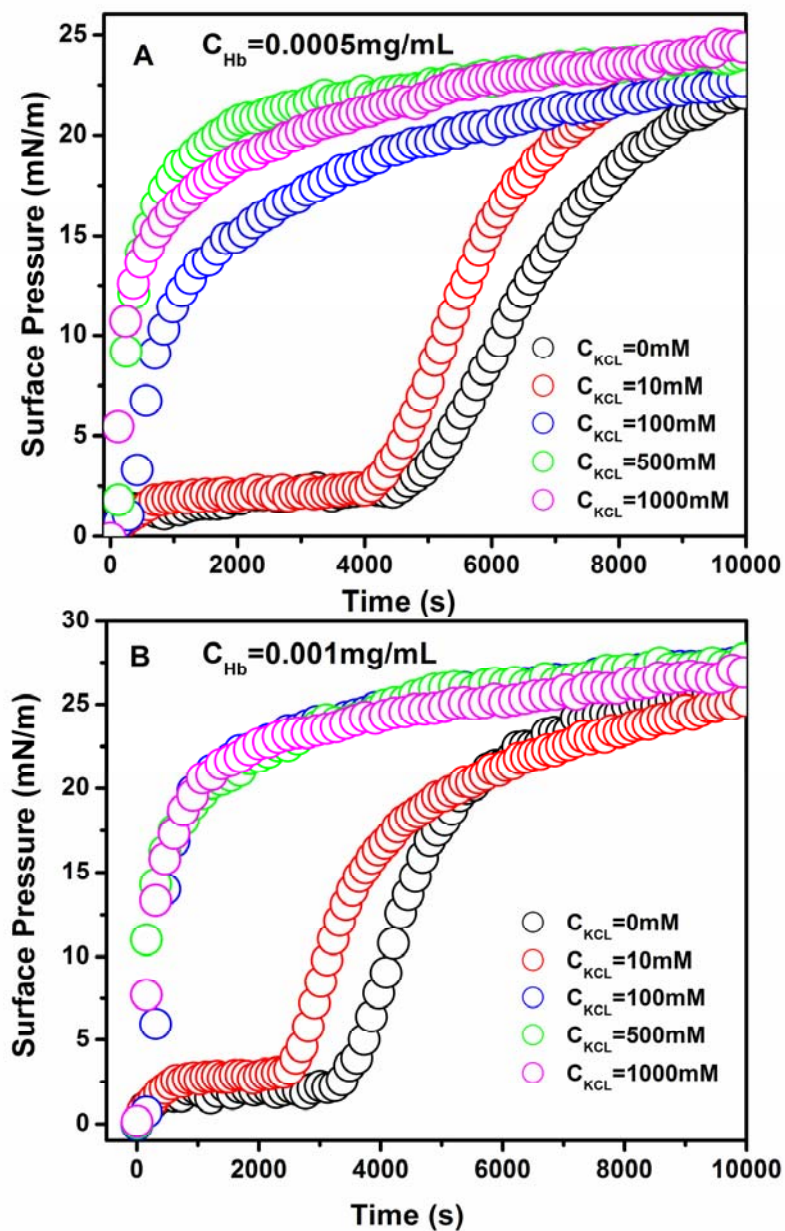

Supplement: c0cp00344a.pdf [file c0cp00344a.pdf]
